# Supplementary material for: Spermidine alleviates cardiac aging by improving mitochondrial biogenesis and function
Source: publisher site journal article supplement (doi:10.18632/aging.102647), 2020-01-06
Supplement: Supplementary file [file aging-v12i1-102647-supplementary-material-SD1.pdf]

## SUPPLEMENTARY MATERIALS

### Effects of H<sub>2</sub>O<sub>2</sub> on cell viability

Primary neonatal rat cardiomyocytes (NRCMs; Supplementary Figure 1) and H9C2 cells (Supplementary Figure 2) were exposed to various concentrations of H<sub>2</sub>O<sub>2</sub> for 4 h (left graphs) or to 40

μmol/L H<sub>2</sub>O<sub>2</sub> for different times (right graphs), and subsequently cultured for additional 48 h in normal medium. The viability of cardiomyocytes was evaluated using the CCK8 assay. We established an optimal sub-lethal concentration of 40 μmol/L of H<sub>2</sub>O<sub>2</sub>, and a treatment duration of 4 h to induce premature senescence in cell cultures.
