# Supplementary material for: Spermidine alleviates cardiac aging by improving mitochondrial biogenesis and function
Source: publisher site journal article supplement (doi:10.18632/aging.102647), 2020-01-06
Supplement: Supplementary file [file aging-v12i1-102647-supplementary-material-SD2.pdf]

SUPPLEMENTARY FIGURES

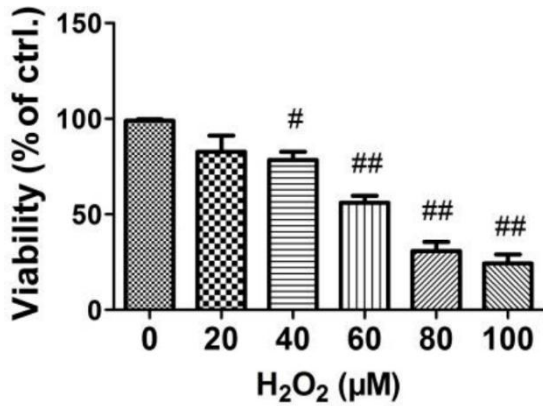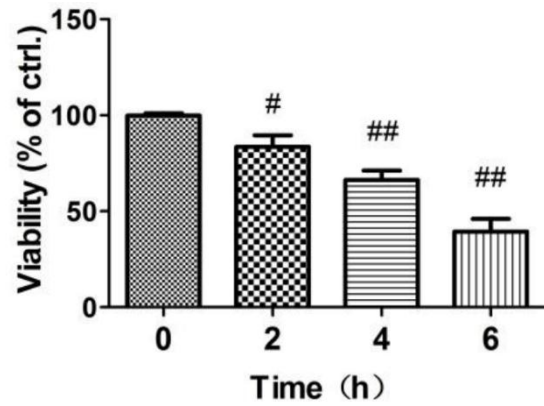

Supplementary Figure 1. Effect of hydrogen peroxide on cell viability of primary NRCMs. Bars = means ± SD; n = 8 per group. # P < 0.05 vs. blank group. ## P < 0.01 vs. blank group.

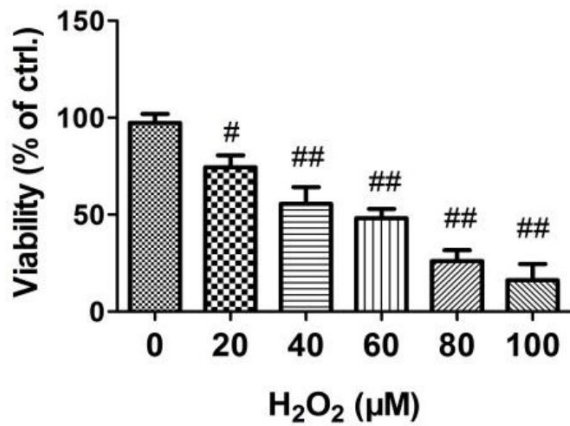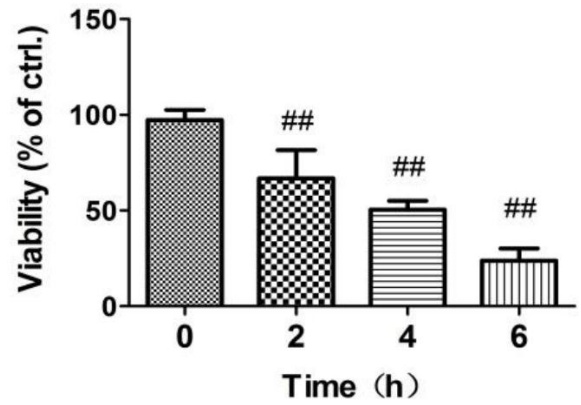

Supplementary Figure 2. Effect of hydrogen peroxide on the viability of H9C2 cells. Bars = means ± SD; n = 8 per group. # P < 0.05 vs. blank group. ## P < 0.01 vs. blank group.
